# Supplementary material for: Ion aggregation in concentrated aqueous and methanol solutions of polyoxometallates Keggin anions: the effect of counterions investigated by molecular dynamics simulations
Source: Royal Society of Chemistry journal article supplement (doi:10.1039/b810440a), 2008-01-01
Supplement: b810440a.pdf [file b810440a.pdf]

|                                             | <b>Water Diluted</b> | <b>Water Concentrated</b> | <b>Methanol Concentrated</b> |
|---------------------------------------------|----------------------|---------------------------|------------------------------|
| NBu <sub>4</sub> <sup>+</sup>               | -230                 | -201                      | -150                         |
| Cs <sup>+</sup>                             | -391                 | -373                      | -225                         |
| H <sub>3</sub> O <sup>+</sup>               | ***                  | -346                      | ***                          |
| H <sub>5</sub> O <sub>2</sub> <sup>+</sup>  | ***                  | -336                      | ***                          |
| UO <sub>2</sub> <sup>2+</sup>               | -365                 | -330                      | -183                         |
| Eu <sup>3+</sup>                            | -375                 | -340                      | -150                         |
| Eu <sup>3+</sup><br>(H <sub>2</sub> O SPCE) | ***                  | -338                      | ***                          |

**TABLE S1:** Average interaction energy of one PW<sup>3-</sup> with the solvent (Averages taken over the last 2 ns of dynamics and over all PW<sup>3-</sup> anions).

|                                             | <b>Water Diluted</b> | <b>Water Concentrated</b> | <b>Methanol Concentrated</b> |
|---------------------------------------------|----------------------|---------------------------|------------------------------|
| NBu <sub>4</sub> <sup>+</sup>               | 4802<br>(171)        | 28920<br>(152)            | 26263<br>(138)               |
| Cs <sup>+</sup>                             | 3678<br>(131)        | 24017<br>(126)            | 24782<br>(130)               |
| H <sub>3</sub> O <sup>+</sup>               | ***                  | 26094<br>(137)            | ***                          |
| H <sub>5</sub> O <sub>2</sub> <sup>+</sup>  | ***                  | 26275<br>(138)            | ***                          |
| UO <sub>2</sub> <sup>2+</sup>               | 3924<br>(140)        | 26454<br>(139)            | 25405<br>(133)               |
| Eu <sup>3+</sup>                            | 3798<br>(136)        | 26794<br>(141)            | 27090<br>(143)               |
| Eu <sup>3+</sup><br>(H <sub>2</sub> O SPCE) | ***                  | 26736<br>(140)            | ***                          |

**TABLE S2:** PW<sup>3-</sup> - PW<sup>3-</sup> interaction energies (kcal/mol). Averages over the last 2 ns of dynamics. In brackets average per PW<sup>3-</sup>...PW<sup>3-</sup> pair.

|                                             | <b>Water<br/>Diluted</b> | <b>Water<br/>Concentrated</b> | <b>Methanol<br/>Concentrated</b> |
|---------------------------------------------|--------------------------|-------------------------------|----------------------------------|
| NBu <sub>4</sub> <sup>+</sup>               | -1592<br>(-66)           | -3294<br>(-54)                | -3019<br>(-50)                   |
| Cs <sup>+</sup>                             | -1157<br>(-48)           | -2873<br>(-48)                | -2789<br>(-46)                   |
| H <sub>5</sub> O <sub>2</sub> <sup>+</sup>  | ***                      | -2897<br>(-48)                | ***                              |
| H <sub>3</sub> O <sup>+</sup>               | ***                      | -2879<br>(-48)                | ***                              |
| UO <sub>2</sub> <sup>2+</sup>               | -1244<br>(-103)          | -2928<br>(-97)                | -2898<br>(-97)                   |
| Eu <sup>3+</sup>                            | -1202<br>(-150)          | -2956<br>(-147)               | -3112<br>(-155)                  |
| Eu <sup>3+</sup><br>(H <sub>2</sub> O SPCE) | ***                      | -2969<br>(-148)               | ***                              |

**TABLE S3:** Average interaction energy between one PW<sup>3-</sup> and all M<sup>n+</sup> counterions (kcal/mol). Averages over the last 2 ns of dynamics and over all PW<sup>3-</sup>. In brackets: average interaction energy per PW<sup>3-</sup> - M<sup>n+</sup> pair.

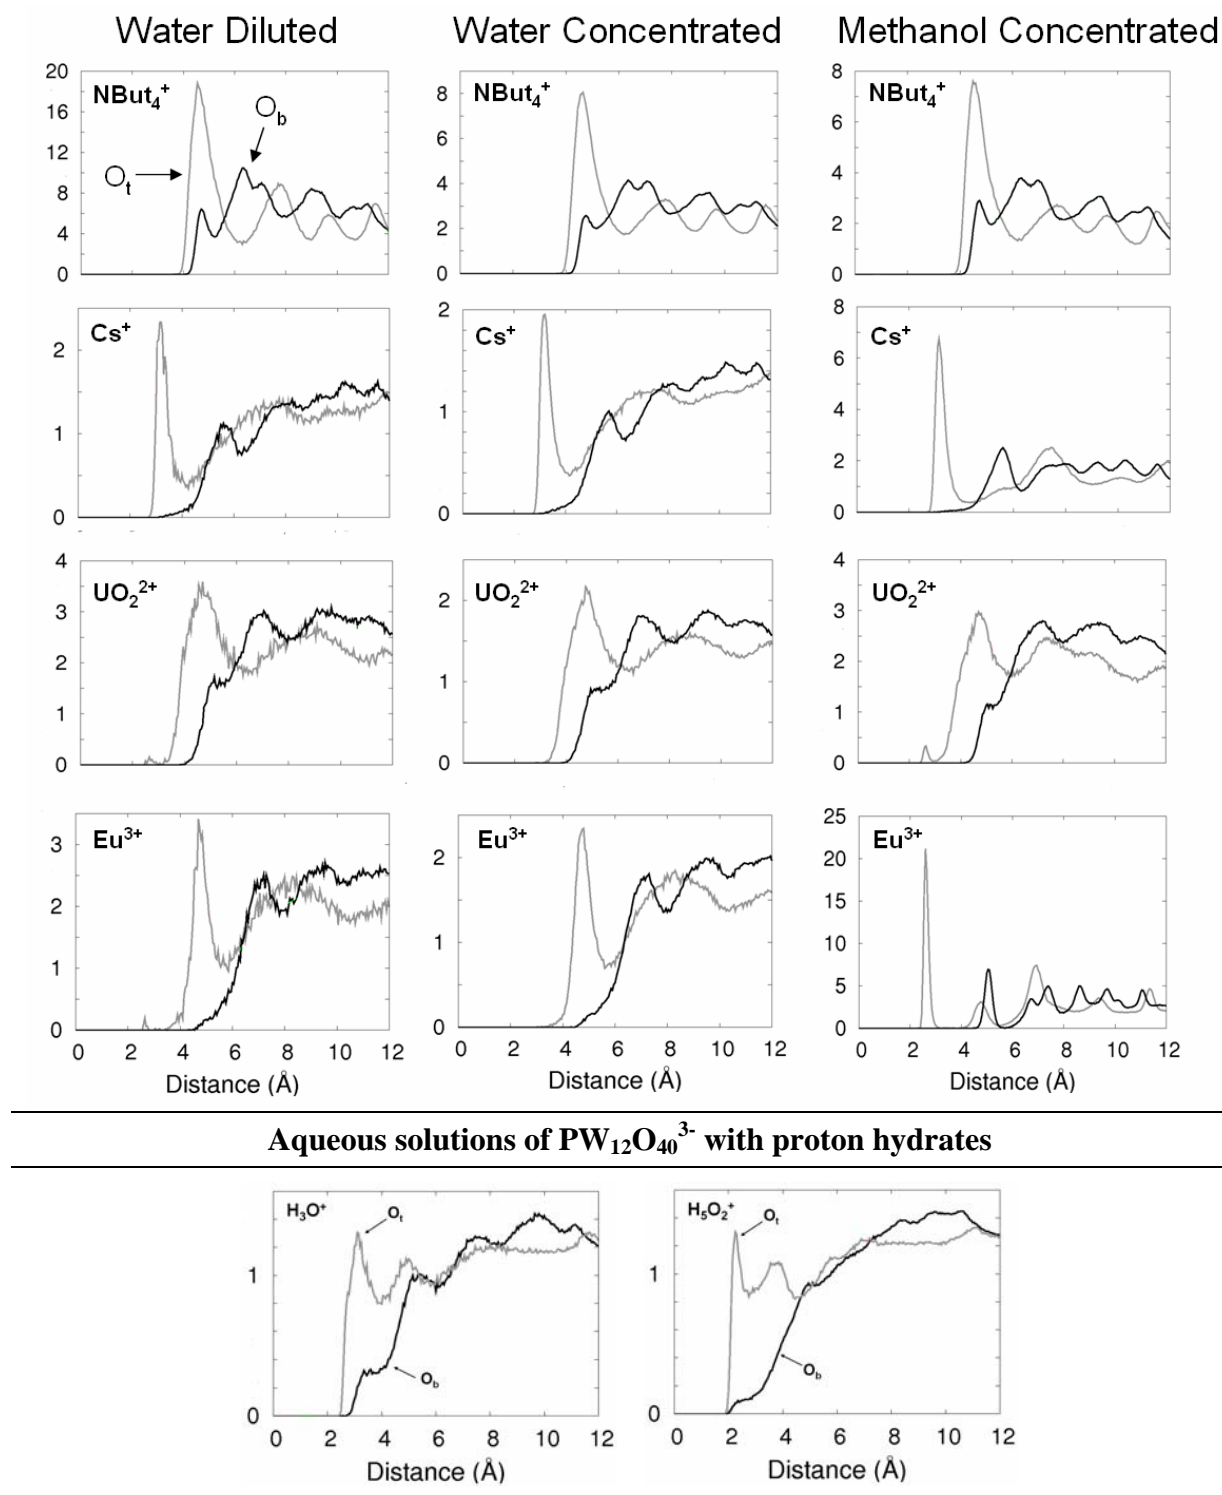

**FIGURE S1:**  $\text{O}_t \dots \text{M}^{n+}$  (grey) and  $\text{O}_b \dots \text{M}^{n+}$  (black) RDFs in diluted and concentrated aqueous solutions and in methanol.

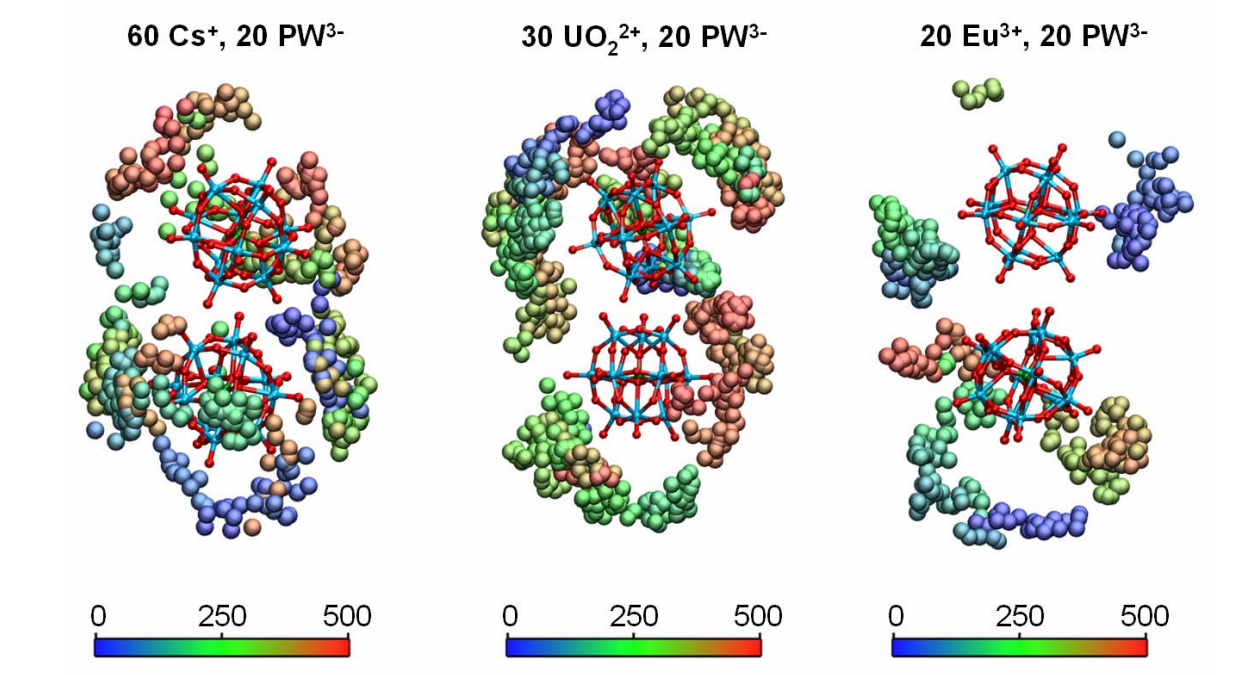

**FIGURE S2:** (PW<sup>3-</sup>)<sub>2</sub> dimers with Cs<sup>+</sup>, UO<sub>2</sub><sup>2+</sup> or Eu<sup>3+</sup> counterions within 3 Å: cumulated views over 1 ns. Different regions of same color correspond to different cations at a given time.

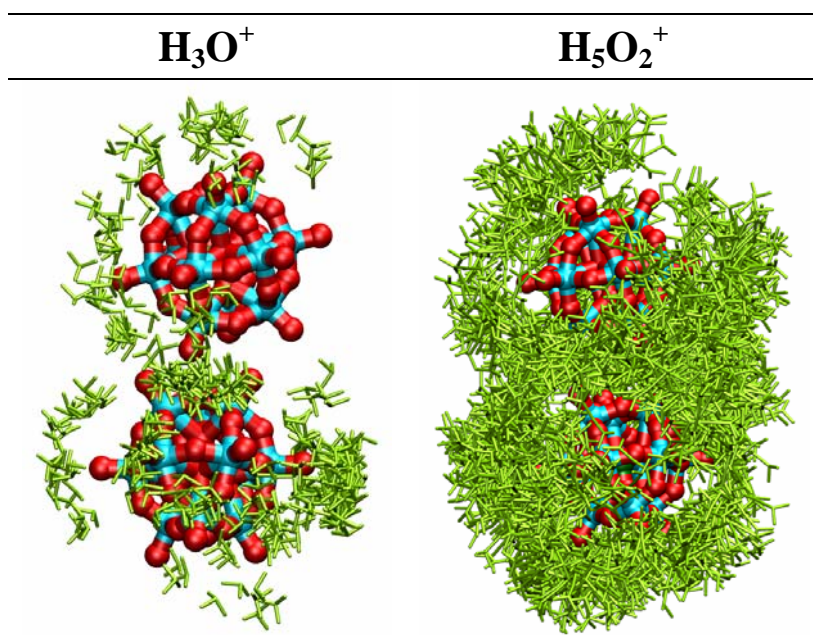

**FIGURE S3:**  $(\text{PW}^{3-})_2$  dimer with  $\text{H}_3\text{O}^+$  vs  $\text{H}_5\text{O}_2^+$  counterions in water: cumulated views of first shell  $\text{M}^+$  counterions.

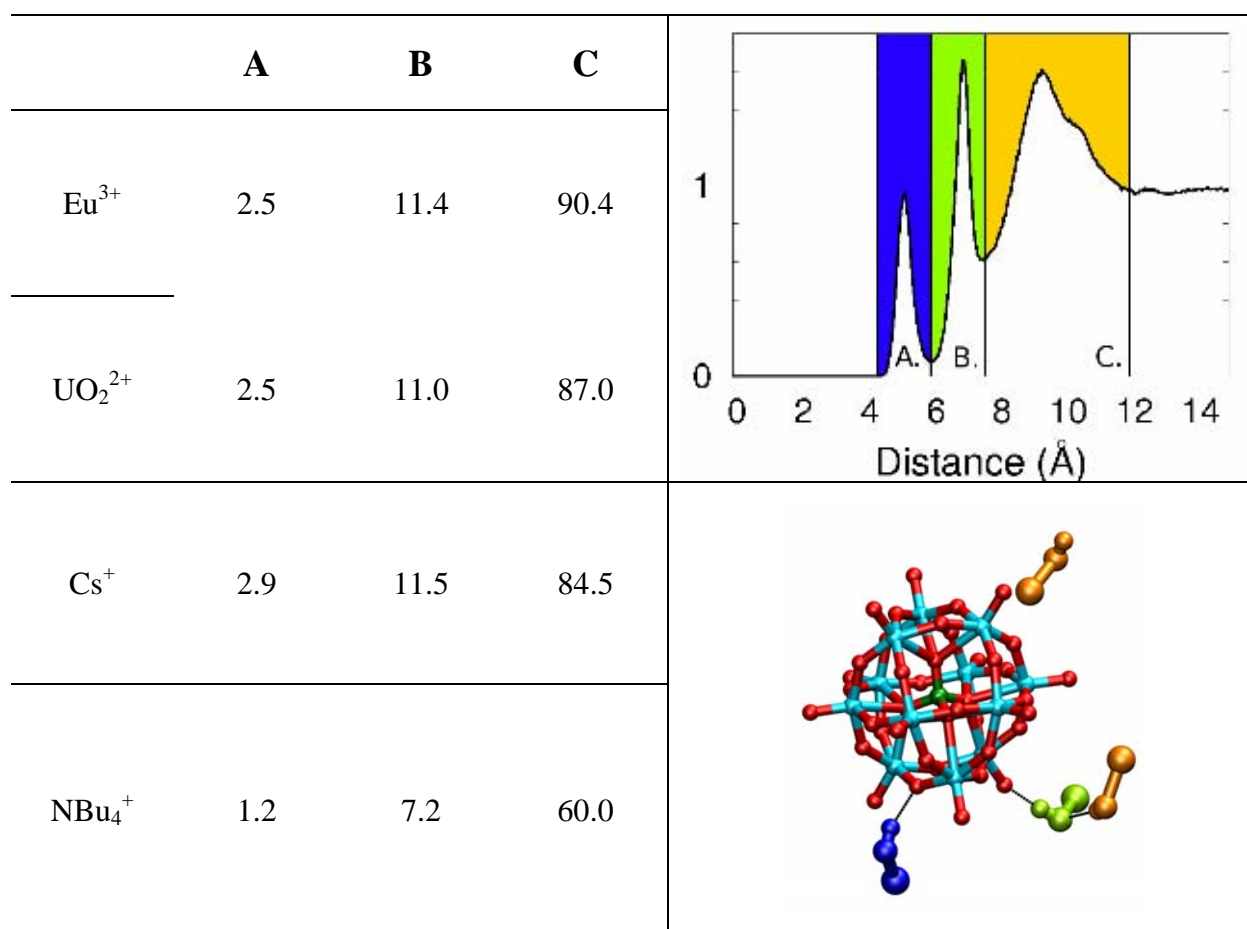

**Figure S4:** PW<sup>3-</sup> with NBu<sub>4</sub><sup>+</sup>, Eu<sup>3+</sup>, UO<sub>2</sub><sup>2+</sup> and Cs<sup>+</sup> counterions in methanol. *Right:* P...H<sub>MeOH</sub> RDFs, and snapshots of typical solvation patterns. *Table left:* Integration of the A – C peaks of the RDFs for the different salts.



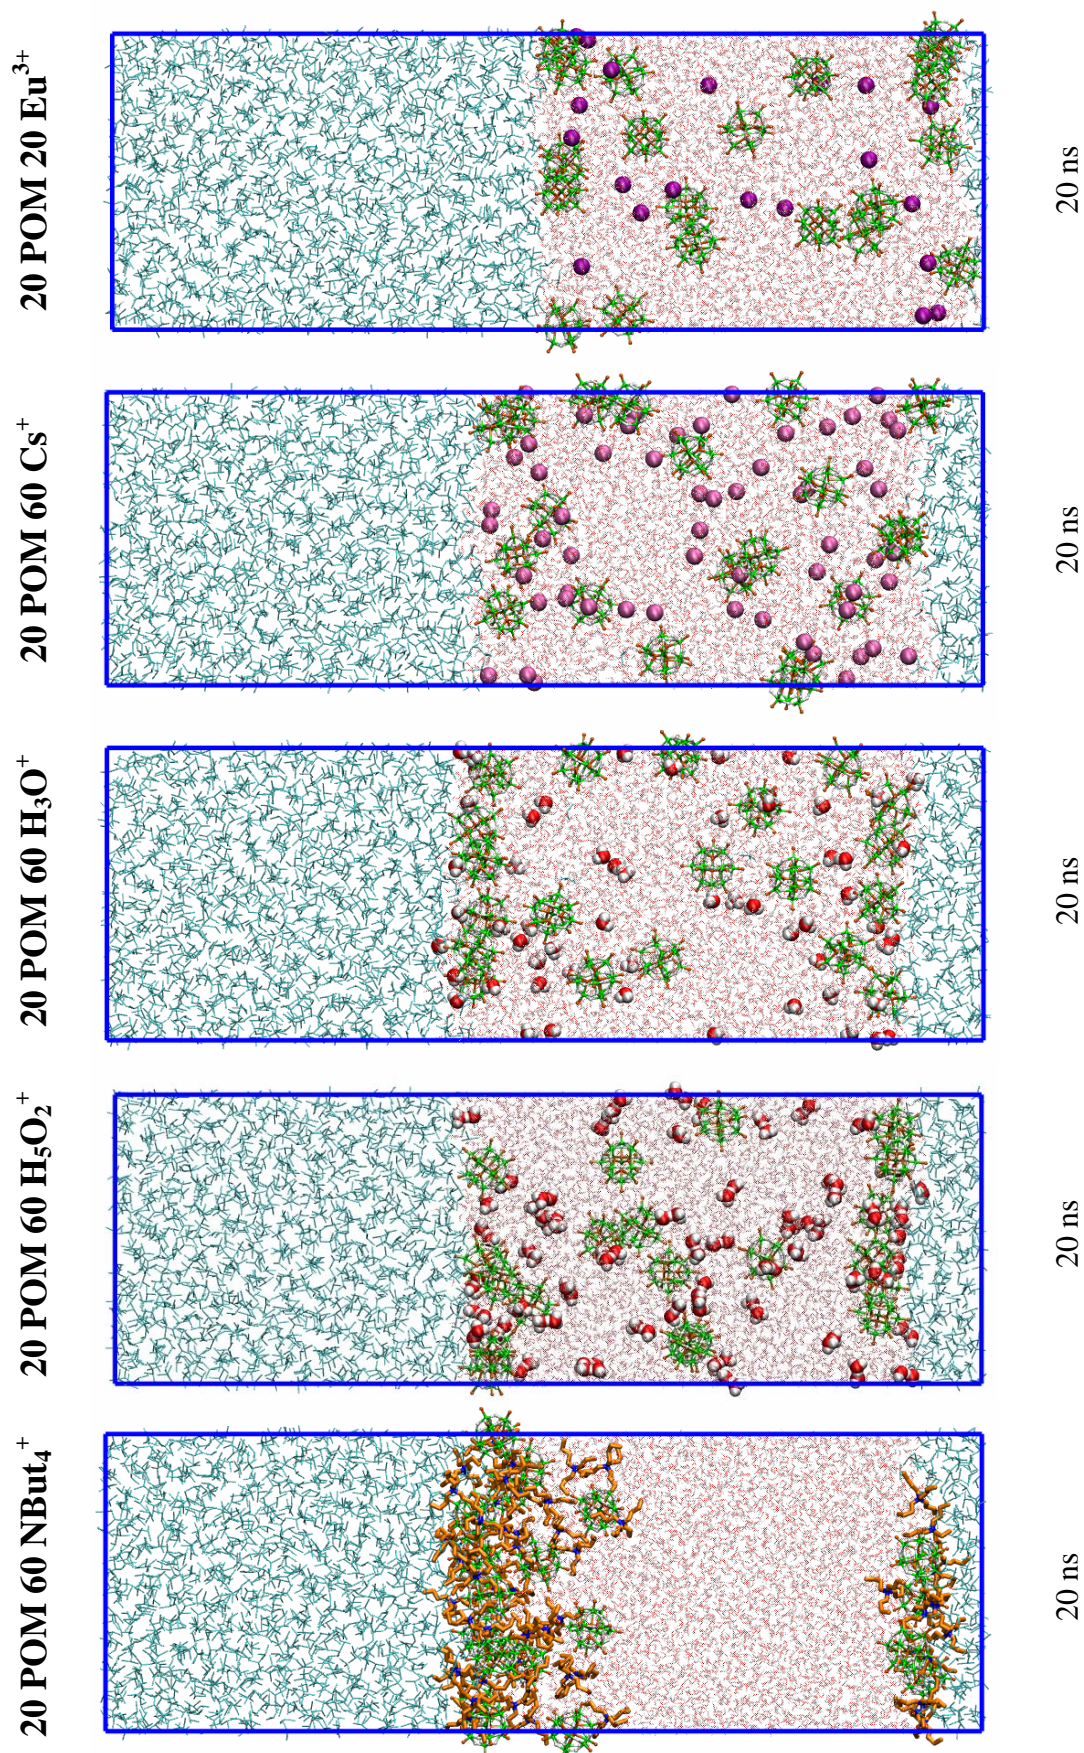

**Figure S5:** 20 PW<sup>3-</sup> with either Eu<sup>3+</sup>, Cs<sup>+</sup>, H<sub>3</sub>O<sup>+</sup>, H<sub>5</sub>O<sub>2</sub><sup>+</sup> or NBut<sub>4</sub><sup>+</sup> as counterions at the chloroform / water interface.



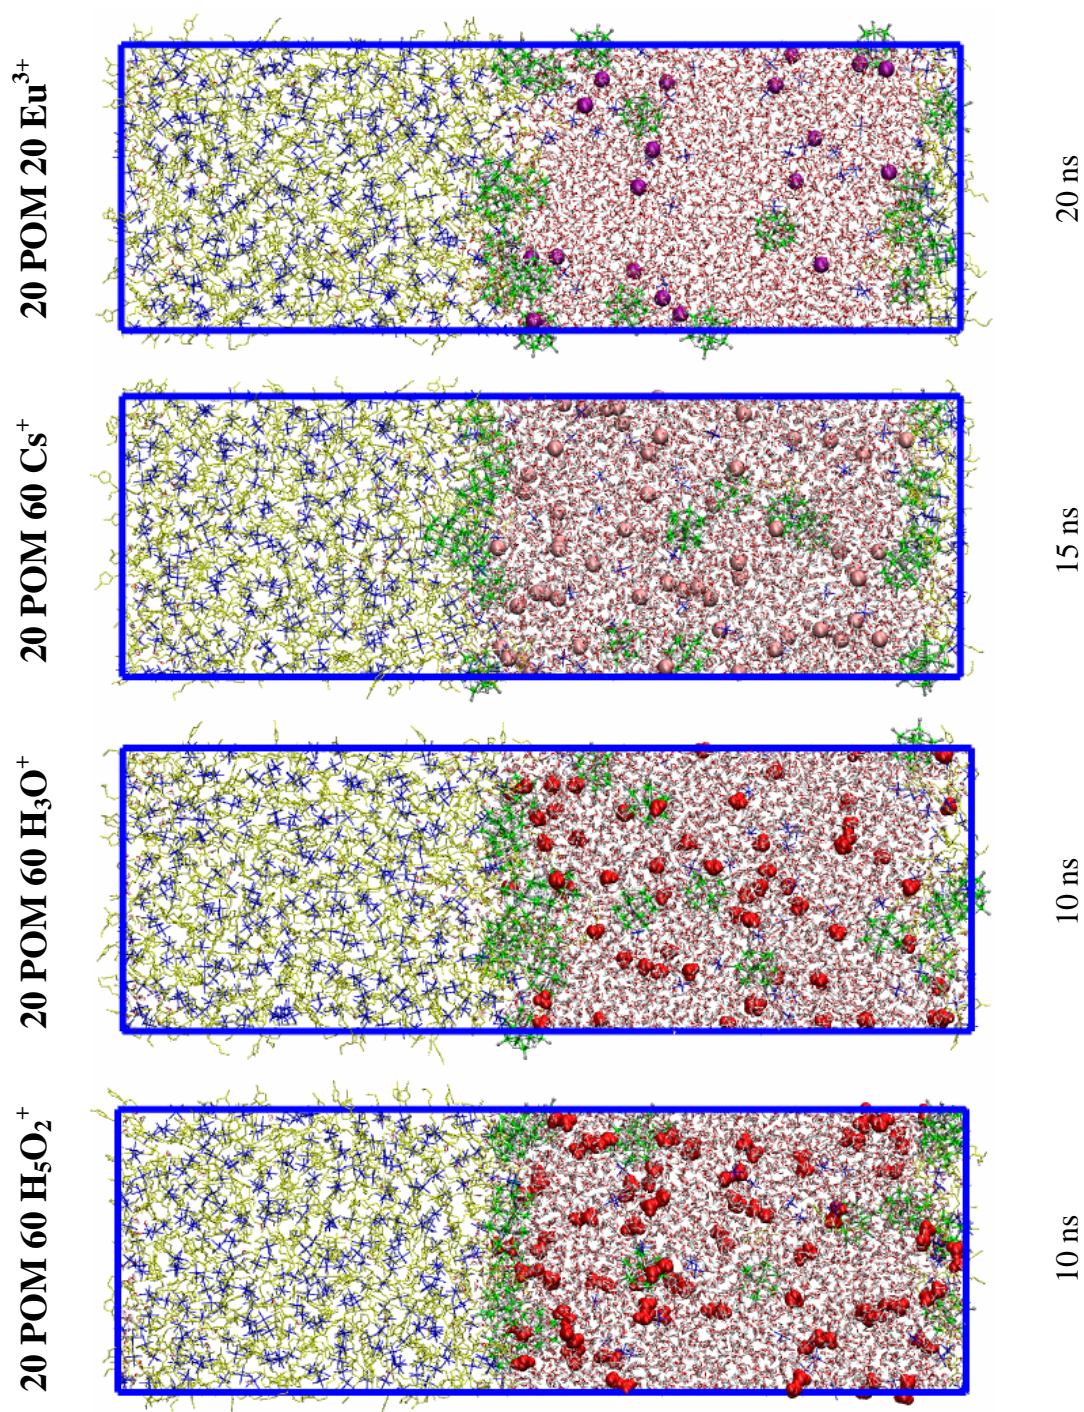

**Figure S6:** 20  $\text{PW}^{3-}$  with either  $\text{Eu}^{3+}$ ,  $\text{Cs}^+$ ,  $\text{H}_3\text{O}^+$  or  $\text{H}_5\text{O}_2^+$  as counterions at the aqueous interface with the  $[\text{OMI}][\text{PF}_6]$  room temperature ionic liquid (based on the octyl-methyl imidazolium  $\text{OMI}^+$  cation and the  $\text{PF}_6^-$  anion).
